# Supplementary material
Source: PubMed Central journal article supplement (PMC2757183)

**TABLE S1****Purification of recombinant RcPPC4 from 16 g of *E. coli***

| <b>Step</b>                     | <b>Activity</b> | <b>Protein</b> | <b>Specific Activity</b> | <b>Purification</b> | <b>Yield</b> |
|---------------------------------|-----------------|----------------|--------------------------|---------------------|--------------|
|                                 | <i>units</i>    | <i>mg</i>      | <i>units/mg</i>          | <i>-fold</i>        | <i>%</i>     |
| Clarified Extract               | 434             | 3,999          | 0.11                     | 1                   | 100          |
| Ni <sup>2+</sup> -affinity FPLC | 241             | 76             | 3.2                      | 29                  | 56           |
| Superdex-200 FPLC               | 27              | 1.0            | 27                       | 254                 | 7            |

## SUPPLEMENTAL FIGURE LEGENDS

### FIGURE S1. BTPC and PTPC sequence alignment.

Several deduced PEPC sequences were aligned using the Clustal W software (<http://www.ebi.ac.uk/Tools/clustalw2/index.html>). Residues with known catalytic and regulatory importance (1-8) are highlighted. The corresponding NCBI protein accession numbers are as follows: Maize-C4, P047111; AtPPC3, AAC24594; RcPPC3, ABR29876; AtPPC4 (BTPC), CAD56727; RcPPC4 (BTPC), ABR29877; *E. coli*, NP\_290593.

### FIGURE S2. Susceptibility of recombinant RcPPC4 to proteolysis by endogenous COS proteases or exogenous thrombin.

A clarified extract from stage VII developing COS was preincubated for 2 h at 25 °C to allow for complete cleavage of native RcPPC4 p118 subunits by endogenous proteases (7). Recombinant RcPPC4 (30 µg) was then incubated at 25 °C in 200-µl of this extract (COS extract), or with 30 mU of thrombin protease (*Thromb.*) (Novagen) in 50-µl of thrombin reaction buffer (20 mM Tris-HCl, pH 8.4, 150 mM NaCl, 2.5 mM CaCl<sub>2</sub>). Aliquots taken at the indicated times were boiled in SDS sample buffer and subjected to SDS-PAGE and immunoblotting with anti-(recombinant RcPPC4)-IgG (A) or anti-(RcPPC4 peptide)-IgG (B) (7). Each lane contains 700 ng of RcPPC4. It has been established that the 90-kDa immunoreactive polypeptide detected on the anti-(RcPPC4 peptide)-IgG immunoblots of clarified COS extracts arises from a non-specific cross-reaction of this IgG with a 90-kDa sucrose synthase subunit, rather than to a BTPC (7).

### FIGURE S3. pH-activity profiles of recombinant PEPC isoforms.

Activities of recombinant AtPPC3 (●), RcPPC4 (▼), and chimeric Class-2 PEPC (○) were determined using standard assay conditions described under the “Experimental Procedures”, except that the PEP concentration was 16 mM and the pH was varied using a mixture of 25 mM Mes and 25 mM Bis-Tris-propane as the buffer. All values in represent the means of three different experiments and reproducible to within ± 10% of the mean value.

## REFERENCES

1. Kai, Y., Matsumura, H., and Izui, K. (2003) *Arch. Biochem. Biophys.* **414**, 170-179
2. Xu, W., Ahmed, S., Moriyama, H., and Chollet, R. (2006) *J. Biol. Chem.* **281**, 17238-17245
3. Yuan, J., Sayegh, J., Mendez, J., Sward, L., Sanchez, N., Sanchez, S., Waldrop, G., and Grover, S. (2006) *Photosynthesis Res.* **88**, 73-81
4. Takahashi-Terada, A., Kotera, M., Ohshima, K., Furumoto, T., Matsumura, H., Kai, Y., and Izui, K. (2005) *J. Biol. Chem.* **280**, 11798-11806
5. Izui, K., Matsumura, H., Furumoto, T., and Kai, Y. (2004) *Ann. Rev. Plant Biol.* **55**, 69-84
6. Uhrig, R. G., O'Leary, B., Spang, H. E., MacDonald, J. A., She, Y., and Plaxton, W. C. (2008) *Plant Physiol.* **146**, 1346-1357
7. Gennidakis, S., Rao, S., Greenham, K., Uhrig, R. G., O'Leary, B., Snedden, W. A., Lu, C., and Plaxton, W. C. (2007) *Plant J.* **52**, 839-849
8. Uhrig, R. G., She, Y., Leach, C. A., and Plaxton, W. C. (2008) *J. Biol. Chem.* **283**, 29650-29657

## Supplemental Fig. S1

X – catalytically critical residue  
X – hydrophobic PEP binding pocket  
X – glucose-6-P binding/interacting residue  
X – conserved loops in plant-type PEPC, proximal to glucose-6-P binding site  
X – Mg<sup>2+</sup> binding site  
S – phosphorylation site  
X – aspartate/malate binding/interacting residue  
X – intra-dimer salt bridge  
X – HCO<sub>3</sub> binding base  
K – monoubiquitination site

```

MaizeC4      MASTKAPGPGEKHHSIDAQLRQLVPGKVSEDDKLI EYDALLVDRFLNILQDLHGPSLREF 60
AtPPC3      ----MAGRNI EKMASIDAQLRQLVPAKVSEDDKLVEYDALLLDRFLDILQDLHGEDLRET 56
RcPPC3      ----MQPRNLEKLASIDAQLRLLVPAKVSEDDKLVEYDALLLDRFLDILQDLHGEDLKET 56
AtPPC4      -----MTDTTDDIAEEISFQSFEDD-----CKLLGSLFHDVQLQREVG NPFMEK 43
RcPPC4      -----MTDTTDDIAEEISFQSFDDD-----CKLLGNLLNDVQLQREVGSKFMEK 43
E. coli     -----MNEQYSALRSN-----VSMLGKVLGETIKDALGEHILER 34
               .   .:           :* . : : : *   : *

MaizeC4      VQECYEVSADYE-----GKGDTTK--LGELGAKLTGLAPADAILVASSILHMLNLANLAE 113
AtPPC3      VQELYELSAEYE-----GKREPSK--LEELGSVLTSLDPGDSIVISKAFSHMLNLANLAE 109
RcPPC3      VQECYELSAEYE-----GKHDPK--LDELGNLLTSLDPGDSIVIAKFSHMLNLANLAE 109
AtPPC4      VERIRILAQSALNLRMAGIEDTANLLEKQLTSEISKMPLEEALTLARTFTHSLNLMGIAD 103
RcPPC4      LERNRILAQSACNMRLAGIEDTAEELLEKQLALEISRMTLEEALTLARAFSHYLNLMGIAE 103
E. coli     VETIRKLSKSSR----AGNDANR----QELLTTLQNL SNDELLPVARAFSQFLNLANTAE 86
::      :: .      *      :*      :      :      : : : : : : * * . * :

MaizeC4      EVQIAHRRRNSKLLKKGFADEGSATTESDIEETLKRLVSEVGKSPEEVFEALKNQTVDLV 173
AtPPC3      EVQIAHRRRIKLLKKGDFVDESSATTESDIEETFKRLVSDLGKSPEEIFDALKNQTVDLV 169
RcPPC3      EVQIAYRRR-NKLLKKGDFADENSATTESDIEETFKRLVIDLKKSPEEVFDALKNQTVDLV 168
AtPPC4      THHRMH-KVHNVTQL-----ARSCDDIFSQLLQSGISPDELYKTVCKQEVEIV 150
RcPPC4      THHRVR-KARSMTHL-----SKSCDDIFNQLLQSGISAEELYDTTVCKQEVEIV 150
E. coli     QYHSISPKGEAASNP-----EVIARTLRKLKNQPELSEDTIKKAVESLSLELV 134
      :      :      :      :      :      :      * : : : . : : . : : *

MaizeC4      FTAHPTQSARRSLLQKNARIRNCLTQLNAKDITDDDKQELDEALQREIQAAFRTDEIRRA 233
AtPPC3      LTAHPTQSVRRSLLQKHGRIRDCLAQLYAKDITPDDKQELDESLQREIQAAFRTDEIRRT 229
RcPPC3      LTAHPTQSIRRRSLLQKHARIRNCLAQLYAKDITPDDKQELDEALQREIQAAFRTDEIRRT 228
AtPPC4      LTAHPTQINRRTLQYKHIRIAHLLEYNTRSDLSVEDRETLIEDLVREITSLWQTDELRRQ 210
RcPPC4      LTAHPTQINRRTLQYKHIRIAHLLDYNDRPDLTHEDREMLIEDLVREITSIWQTDELRRH 210
E. coli     LTAHPTEITRRTLIHKMVEVNACLKQLDNKDIADYEHNQLMRRLQLIAQSWHTDEIRKL 194
:*****:  **:*  *  .:  *      *::  :::  *  .  *  :  *  :*****:

MaizeC4      QPTPQAEMRYGMSYIHETVWKGVPKFLRRVDTALKNIGINERLPYNVSLIRFSSWMGGDR 293
AtPPC3      PPTPQDEMRAGMSYFHETIWKGVKFLRRVDTALKNIGIDERVPYNAPLIQFSSWMGGDR 289
RcPPC3      APTPQDEMRAGMSYFHETIWKGVKFLRRVDTALKNIGINERVPNAPLIQFSSWMGGDR 288
AtPPC4      KPTPVDEARAGLNIVEQSLWKAVPQYLRRVSNSLKKF-TGKPLPLTCTPMKFGSWMGDR 269
RcPPC4      KPTPVDEARAGLNIVEQSLWKALPHYLRRVSTALKKH-TGKPLPLTCTPIRFGSWMGDR 269
E. coli     RPSPVDEAKWGFAVVNSLWQGVPNYLRELNEQLEEN-LGYKLPVEFVPVRFTSWMGGDR 253
*:*  *  :  * :  . : : : : : : : : : : : * : :  .  :*  : : * *****

```

MaizeC4 DGNPRVTPEVTRDVCLLARMMMAANLYIDQIEELMFELSMWRCNDELRVRAEELHSSS--- 350  
 AtPPC3 DGNPRVTPEVTRDVCLLARMMMAANLYYNQIENLMFELSMWRC TDEFVRVADELHRNS--- 346  
 RcPPC3 DGNPRVTPEVTRDVCLLARMMMAANLYYSQIEDLMFELSMWRCSDDELRVRADELHRSS--- 345  
 AtPPC4 DGNPNVTAKVTKEVSLLSRWMAIDL YIREVDLSLRFELSTDRCSDFRSRLADKILEKD--- 326  
 RcPPC4 DGNPNVTAKVTRDVSLLSRWMAVDLYIREVDLSLRFELSMVQCSDRLLKQVANDILIEETSS 329  
 E. coli DGNPNVTADITRHVLLLSRWKATDLFLKDIQVLVSELSMVEATPELLALVG----- 304  
 \*\*\*\*.\*\*\*..\*:\*.\* \*\*:\* \* :\*: :\*: \* \*\*\* ... .:

MaizeC4 -----  
 AtPPC3 -----  
 RcPPC3 -----  
 AtPPC4 -----YDRGKSNFQKQSSSCLPTQLPARAHLPA CIDF--GESRHTKFEIATTDYMPFN 378  
 RcPPC4 EDHHESWNQPASRSQTKFPRKSLPTQLPPRADLPACTECNDGESQYPKLELPGTDYMPFN 389  
 E. coli -----

MaizeC4 -----  
 AtPPC3 -----  
 RcPPC3 -----  
 AtPPC4 LQKQNEQDFSESDWEKIDNGS-----RSGLTSRGSFSSTSQLLLQRKLFEESEQVG 428  
 RcPPC4 RQEALGSSYSESSSQDINHGLPKTTGNGSVANSSGSPRASFS-AQLVAQRKLF AESKIG 448  
 E. coli -----

MaizeC4 GSKVTKYYIEFWKQIPPNEPYRVILGHVRDKLYNTRERARHLLASGVSEISAESSFTSIE 410  
 AtPPC3 RKDAAKHYIEFWKTIPPEPYRVILGDVRDKLYHTRERSRQLLSNGISDIPEEATFTNVE 406  
 RcPPC3 KRDS-KHYIEFWKQVPPSEPYRVILGDLRDKLYQTRERSRQMLSHGNSDIPEEATFTNVE 404  
 AtPPC4 KTSFQKLLLEPPPLKRAGSAPYRIVLGEVKEKLVKTRRLELLIEGLPCEYDPKNSYETSD 488  
 RcPPC4 RSSFQKLLLEPSLPQRPGIAPYRIVLGNVKDKLMRTRRLELLLEDLPCEYDQWDYYETTD 508  
 E. coli -----EEGAAEPYRYLMKNLRSRLMATQAWLEARLKGEELPK-PEGLLTQNE 350  
 \*\*\* :: :.:.\* \* : . :

MaizeC4 EFLEPLELICYKSLCDCGDKAIADGSLLDLLRQVFTFGLSLVKLDIRQESERHTDVIDAIT 470  
 AtPPC3 QFLEPLELICYRSLCSCGDSPDIADGSLLDLFRQVSTFGLSLVRLDIRQESERHTDVLDAIT 466  
 RcPPC3 QFLEPLELICYRSLCSCGDQPIADGSLLDLFRQVSTFGFSLVRLDIRQESDRHTDVMMDTIT 464  
 AtPPC4 QLLEPLLLCYESLQSSGARVLADGRLADLIRRSTFGMVLVKLDLDRQEAARHSEALDAIT 548  
 RcPPC4 QLLEDPLLLCYESLQSCGAGVLADGRLADLIRRATFGMVLKLDLDRQESGRHADTLDAIT 568  
 E. coli ELWEPLYACYQSLQACGMGIIANGDLLDTRLRRVKCFGVPLVRIDIRQESTRHTEALGELT 410  
 :: :.\* \*\*.\* \* : :.\* \* \* :.\* \* \*\* . :.:.\* : \* : : . \*

MaizeC4 THLGIG-SYREWPEDKRQEWLLSELRGKRPPLPPDLPQTDEIADVIGAFHVLAELPPDSF 529  
 AtPPC3 KHLDIGSSYRDWSEEGRQEWLLAELSGKRPLFGPDLPKTEEISDVLDTFKVISELPSDCF 526  
 RcPPC3 KHLEIG-SYREWSEERRQEWLLSELSGKRPLFGPDLQRTDEVADVLDTFHVIAELPADSF 523  
 AtPPC4 TYLDMG-TYSEWDEEKKLEFLTR ELKGRPLVPQCIVGPDVKEVLDTFRVAELGSESL 607  
 RcPPC4 KYLEMGTYSEWDEEKKLEFLTR ELKGRPLVPPTIEVAPDVKEVLDAFRVAELGSDSL 627  
 E. coli RYLGIG-DYESWSEADKQAFILIRELNSKRPLLPNWPQSAETREVLDTQCQVIAEAPQSGI 469  
 :\* :\* \* . \* \* : :\* \*\* .\*\*\*\*. : :.:.\* : \* : \*

MaizeC4 GPYIISMATAPSDVLAVELLQRECGVRQP-----LPVVPLFERLADLQSA PASV 578  
 AtPPC3 GAYIISMATSPSDVLAVELLQRECHVKNP-----LRVVPLEKLDLEAAPAAV 575  
 RcPPC3 GAYIISMATAPSDVLAVELLQRECHVKQP-----LRVVPLEKLDLEAAPAAV 572  
 AtPPC4 GAYVISMASNASDVLAVELLQKDARLALTSEHGKPCPGGTLRVVPLFETVNDLRAAGPSI 667  
 RcPPC4 GAYVISMASNASDVLAVELLQKDARLAVSGELGRPCPGGTLRVVPLFETVKDLRAGAGSVI 687  
 E. coli AAYVISMAKTPSDVLAVHLLKKEAGIGFA-----MPVAPLETLDDLNNANDVM 518  
 ..\*:\*\*\*\*\*.\*\*\*\*\*.\*\* :.: . : : \* .\*\*\*\*\* : \*\* . \* :

MaizeC4 ERLFSVDWYMDRIK----GKQQVMVGYSDSGKDAGRLSAAWQLYRAQEEMAQVAKRYGVK 634  
 AtPPC3 ARLFSIDWYKNRIN----GKQEVMIIGYSDSGKDAGRLSAAWELYKAQEELVKVAKKYGVK 631  
 RcPPC3 ARLFSIDWYRNIN----GKQEVMIIGYSDSGKDAGRFSAAWQLYKAQEELIKVAKQFGVK 628  
 AtPPC4 RKLLSIDWYREHIQKNHNGHQEVMVGYSDSGKDAGRFTAAWELYKAQENVVAACNEFGIK 727  
 RcPPC4 RKLLSIDWYREHI IKNHNGHQEVMVGYSDSGKDAGRFTAAWELYKAQEDVVAACNDFGIK 747  
 E. coli TQLLNIDWYRGLIQ----GKQVMVMIIGYSDSAKDAGVMAASWAQYQAQDALIKTCEKAGIE 574  
 :\*:.:\*\*\* \* \*\*: \* \*:\*\*\*\*\*.\*\*\*\*\* :\*: \* :\*: : .: :\*:

#### Mobile Loop I:

MaizeC4 LTLFHGRGGTVGRGGGPTHLAAILSQPPDTINGSIRVTVQGEVIEFCFGEEHLCFQTLQRF 694  
 AtPPC3 LTMFHGRGGTVGRGGGPTHLAAILSQPPDTVNGSLRVTVQGEVIEQSFGEAHLCFRTLQRF 691  
 RcPPC3 LTMFHGRGGTVGRGGGPTHLAAILSQPPDTIHGSLRVTVQGEVNEQSCGEEHLCFRTLQRF 688  
 AtPPC4 ITLFHGRGGSIGRGGGPTYLAIQSQPPGSVMGSLRSTEQGEMVQAKFGIPQTAVRQLEVY 787  
 RcPPC4 VTLFHGRGGSIGRGGGPTYLAIQSQPPGSVMGTLRSTEQGEMVQAKFGLPHTAIRQLEIY 807  
 E. coli LTLFHGRGGSIGRGGGPAHAALLSQPPGSLKGLLRVTEQGEMIRFKYGLPEITVSSLSLY 634  
 :\*:\*\*\*\*\*:\*\*\*\*\*.\*\*: \* : \* \* \* \* : : \* : \* \* \* \* : . \* . . \* . :

MaizeC4 TAATLEHGMHPPVSPKP-EWRKLMDEMAVVATEEYRSVVVKEARFVEYFRSATPETEYGR 753  
 AtPPC3 TAATLEHGMNPPISP KP-EWRALLDEMAVVATEEYRSVVFQEPFRFVEYFRLATPELEYGR 750  
 RcPPC3 TAATLEHGMHPPVSPKP-EWRKLMDEMAVIATEEYRSIVFKEPRFVEYFRLATPELEYGR 747  
 AtPPC4 TTAVLLATLKPQPPEEKWRNLMEEISGISQHYRSTVYENPEFLSYFHEATPQAEELGF 847  
 RcPPC4 TTAVLLATLRPPHPPEEQWRNVMEEISKISQNYRSTVYENPEFLAYFHEATPQAEELGF 867  
 E. coli TGAILEANLLPPEPEKE-SWRRIMDELSVISCQVYRGYVRENKDFVVPYFRSATPEQELGK 693  
 \* \* \* : \*\* \* : .\*\* :\*: : : : \* : \* : : \* : \* \* : \* \* :

#### Mobile Loop II:

#### Characteristic Ser of C<sub>4</sub> PEPC

MaizeC4 MNIGSRPAKRRPGGGITTLLRAIPWIFSWTQTRFHLPVWLGVGAAFKFAIDKDVRNFQVLK 813  
 AtPPC3 MNIGSRPSKRKPSGGIESLRAIPWIFAWTQTRFHLPVWLGFGAAFRYAIAIKKDVRNLHMLQ 810  
 RcPPC3 MNIGSRPSKRKPSGGIESLRAIPWIFAWTQTRFHLPVWLGFGAAFKHVIQKDVRNLHMLQ 807  
 AtPPC4 LNIGSRPTRRKSSSGIGHLRAIPWVFAWTQTRFVLPWALGVLGAGLKGVSEKGAH--DDLK 905  
 RcPPC4 LNIGSRPTRRKSSTGIHGLRAIPWVFAWTQTRFVLPWALGVLGAGLKGACEKGFT--EDLK 925  
 E. coli LPLGSRPAKRRPTGGVESLRAIPWIFAWTQNRMLPAWLGAGTALQKVVEDGKQ--SELE 751  
 : : \* \* \* \* : : \* : \* \* \* \* : \* : \* \* \* \* \* : : : . . . . \* :

MaizeC4 EMYNEWPFVRVTLDLLEMVFAKGDGPIAGLYDELLEVAEELKPFQKQLRDKYVETQQLLLQ 873  
 AtPPC3 DMYKQWPFVRVTLDLIEMVFAKGDGPIAALYDKLLVSEDLWAFGEKLRANFDETKNLVLQ 870  
 RcPPC3 EMYNEWPFVRVTLDLVEMVFAKGDGPIAALYDKLLVSQDLWSFGERLRTNYEETKRLLLQ 867  
 AtPPC4 EMYKEWPFQSTLELIEMVLAKADIPMTKHYDEQLVSEKRRGLGTELKELMTTEKYVLV 965  
 RcPPC4 AMYKEWPFQSTIDLIEMVLGKADIPIAKHYDEVLVSESRRELGAELRSELLTTEKYVLV 985  
 E. coli AMCRDWPFFSTRLGMLEMVFADLWLAEYDQRLVDKALWPLGKELRNLQEEDIKVVLA 811  
 \* . : \* \* \* \* : : \* \* \* \* : \* : \* \* \* \* : \* : \* \* \* \* : . : \*

MaizeC4 IAGHKDILEGDPFLKQGLVLRNPYITTLNVFQAYTLKRIRDPNFKVTPQPPLSKEFADEN 933  
 AtPPC3 TAGHKDLLEGDPYLKQRLRLRDSYITTLNVCQAYTLKRIRDANYNVTLRPHISKEIMQSS 930  
 RcPPC3 IAGHKDLLEGDPYLKQRLRLRDSYITTLNVCQAYTLKRIRDPNYNVTLRPHISKEIMESS 927  
 AtPPC4 ISGHEKLLQDNKSLKLLIDSRLPYLNAMNMLQVEILKRLRRDED----- 1009  
 RcPPC4 VSGHEKLSQNNRSLRRLIESRLPYLNPMNMLQVEVLKRLRRDDD----- 1029  
 E. coli IANDSHLMADLPWIAESIQLRNIYTDPLNVLAELLHRSRQAEKEGQ----- 858  
 : . . . : . : : \* \* . : \* : \* \* \* \* :

MaizeC4 KPAG-LVKLNPASEYPPGLEDTLILTMKGIAAGMQNTG 970  
 AtPPC3 KSAQELVKLNPTSEYAPGLEDTLILTMKGIAAGLQNTG 968  
 RcPPC3 KPADELVKLNPKSDYAPGLEDTLILTMKGVAAGLQNTG 965  
 AtPPC4 -----NNKLRDALLITINGIAAGMRNTG 1032  
 RcPPC4 -----NNKLRDALLITINGIAAGMRNTG 1052  
 E. coli -----EPDPRVEQALMVTIAGIAAGMRNTG 883  
 : . : \* \* \* \* : \* \* \* \* \* \*

### Cladogram

---

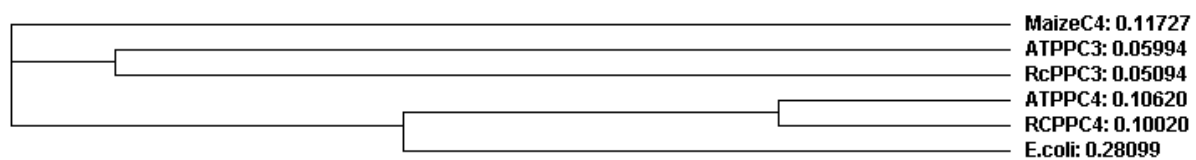

### Phylogram

---

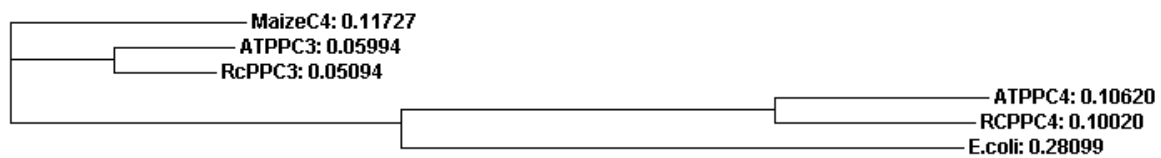

Supplemental Fig. S2

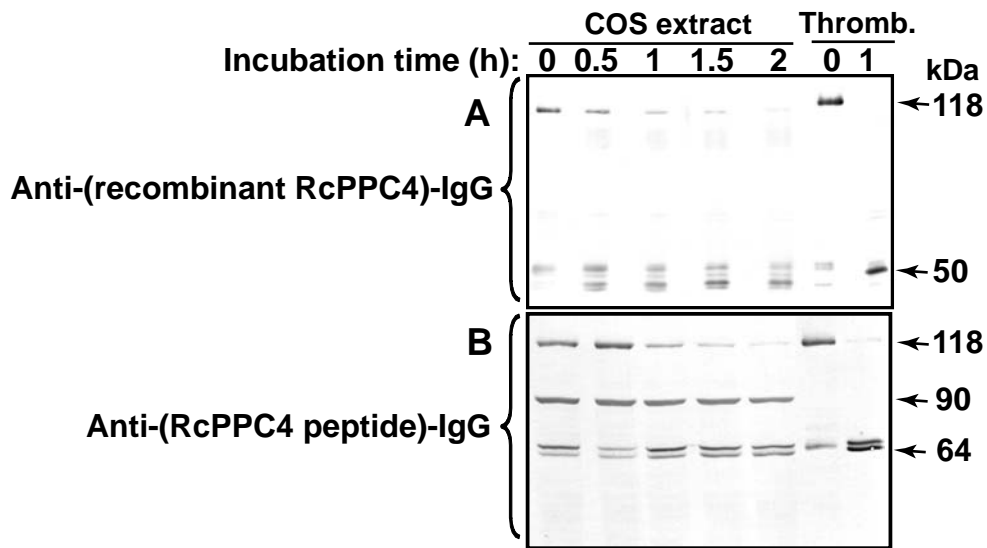

Supplemental Fig. S3

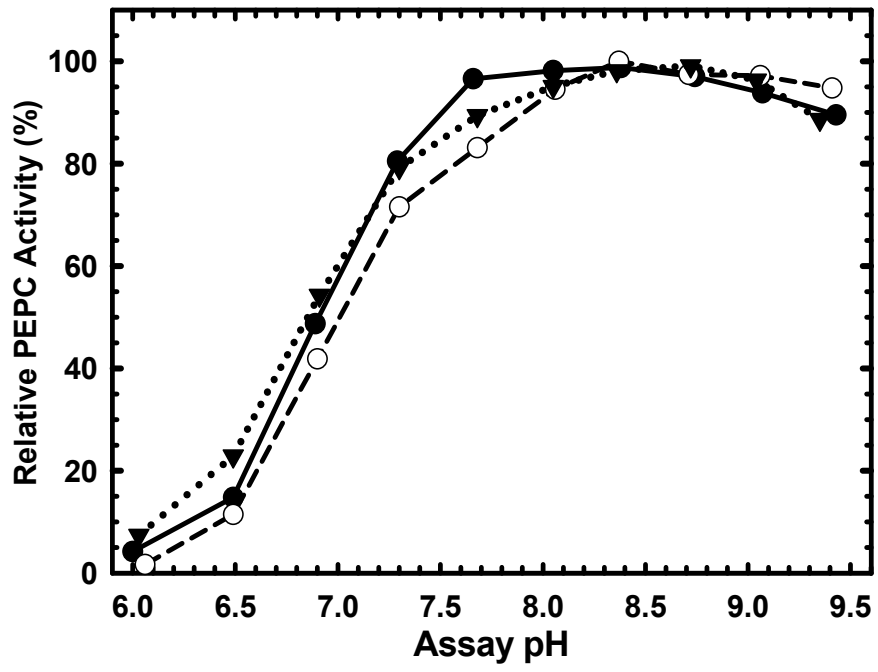

Supplement: supp_M109.022863_jbc.M109.022863-1.pdf [file supp_M109.022863_jbc.M109.022863-1.pdf]
